# Supplementary material
Source: PubMed Central journal article supplement (PMC164668)

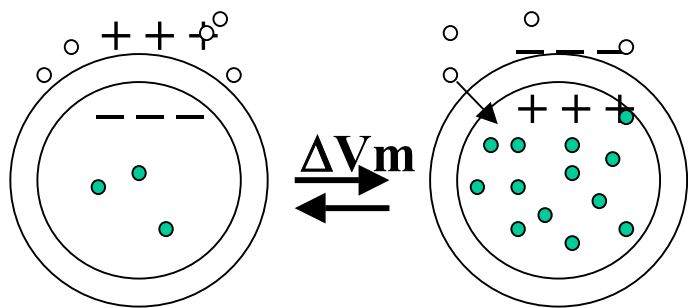

**Hyperpolarization**

**Decrease in  
Fluorescence** ↓

**Depolarization**

↑ **Increase in  
Fluorescence**

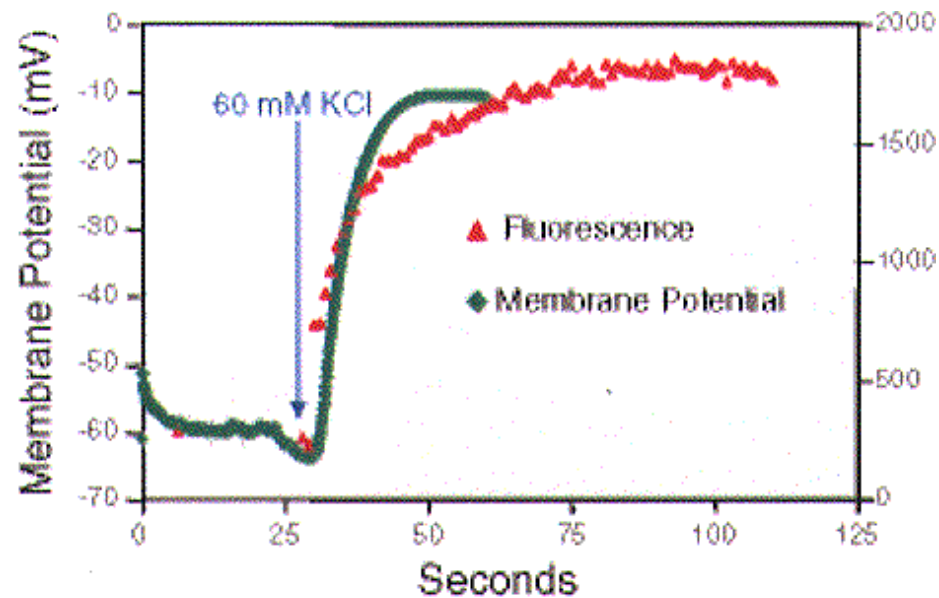

Supplement: pnas_1232448100_2.pdf [file pnas_1232448100_2.pdf]

# Multiple Well Overlay

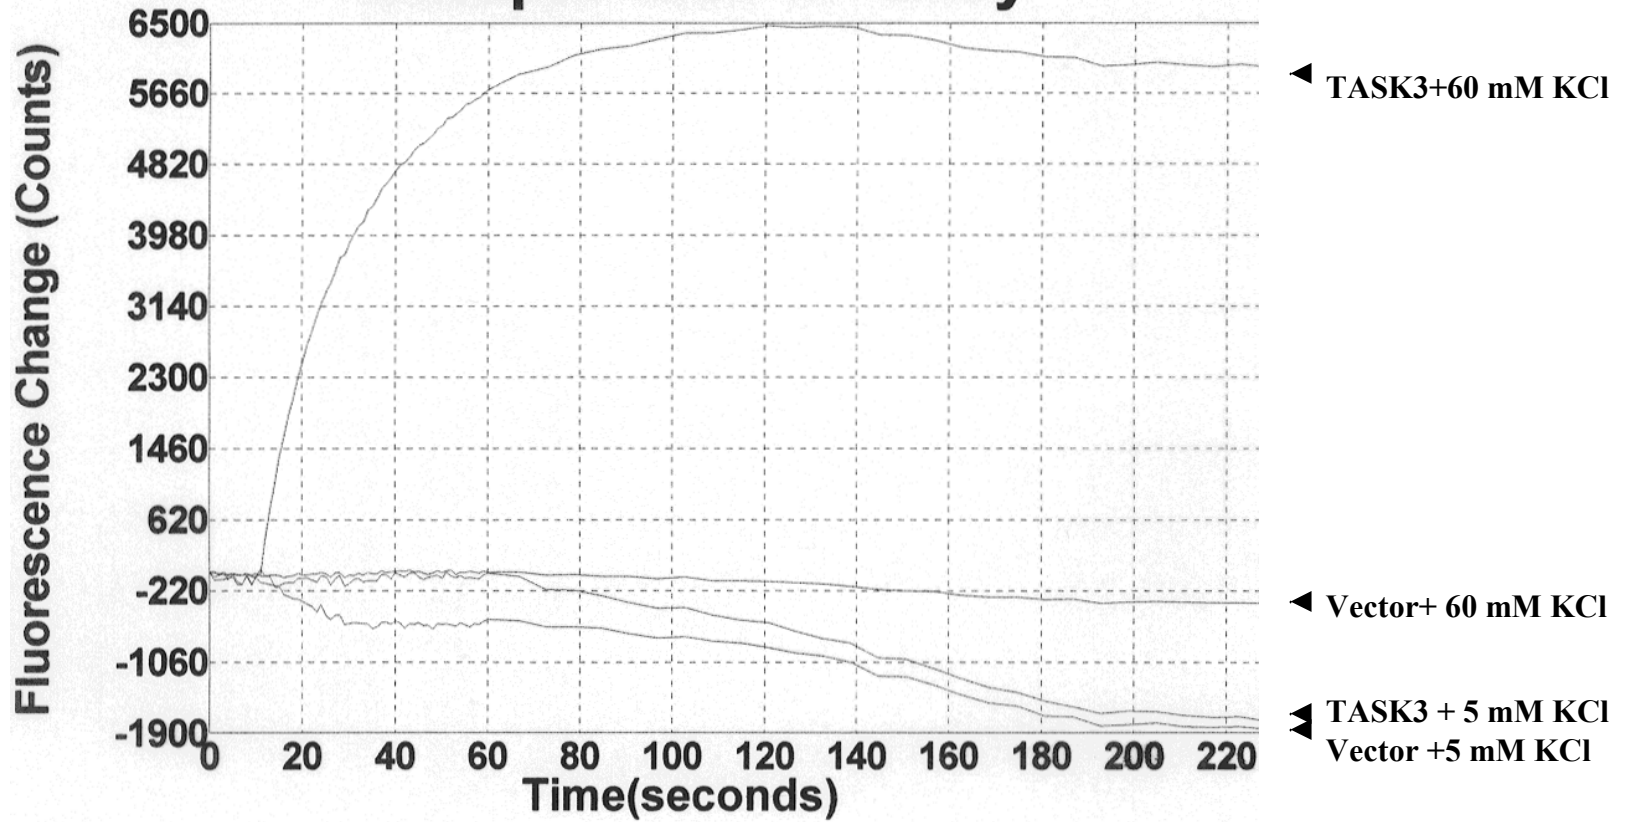

Supplement: pnas_1232448100_4.pdf [file pnas_1232448100_4.pdf]

**MEF**    **BEN**

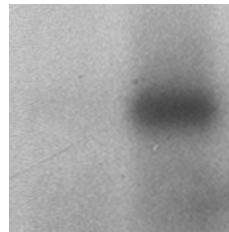

← **TASK3**

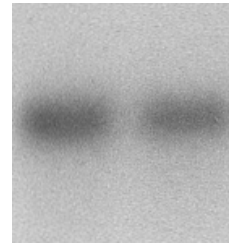

← **ACTIN**

Supplement: pnas_1232448100_6.pdf [file pnas_1232448100_6.pdf]
